# Supplementary material
Source: MDPI journal article supplement (https://www.mdpi.com/2073-8994/14/6/1228)
Supplement: s1 [file s1]

**Table S1.** Voltages ( $U_i$ , mV) and delays ( $t_i$ , ns) of pulses along the active conductor of CC 1.

| Node  | V5   |      |      | V10  |      |      |      |      |      |      |      |      |
|-------|------|------|------|------|------|------|------|------|------|------|------|------|
| $i$   | 1    | 2    | 3    | 1    | 2    | 3    | 4    | 5    | 6    | 7    | 8    | 9    |
| $U_i$ | 132  | 151  | 174  | 33   | 38   | 43   | 38   | 43   | 49   | 43   | 50   | 57   |
| $t_i$ | 0.09 | 0.11 | 0.13 | 1.02 | 1.08 | 1.11 | 1.17 | 1.23 | 1.29 | 1.35 | 1.38 | 1.44 |

**Table S2.** Voltages ( $U_i$ , mV) and delays ( $t_i$ , ns) of pulses along the active conductor of CC 2.

| Node  | V5   |      |      | V10  |      |      |      |      |      |     |      |      |
|-------|------|------|------|------|------|------|------|------|------|-----|------|------|
| $i$   | 1    | 2    | 3    | 1    | 2    | 3    | 4    | 5    | 6    | 7   | 8    | 9    |
| $U_i$ | 107  | 122  | 141  | 42   | 48   | 55   | 23   | 26   | 31   | 40  | 46   | 53   |
| $t_i$ | 0.09 | 0.11 | 0.13 | 1.45 | 1.55 | 1.65 | 1.79 | 1.85 | 1.95 | 2.1 | 2.18 | 1.26 |

**Table S3.** Voltages ( $U_i$ , mV) and delays ( $t_i$ , ns) of pulses along the active conductor of CC 3.

| Node     |          | V5       |          |          | V10      |          |          |          |          |          |          |          |          |
|----------|----------|----------|----------|----------|----------|----------|----------|----------|----------|----------|----------|----------|----------|
| $i$      | 1        | 2        | 3        | 1        | 2        | 3        | 4        | 5        | 6        | 7        | 8        | 9        |          |
| $U_i$    | 107      | 122      | 141      | 43       | 49       | 56       | 24       | 27       | 31       | 41       | 47       | 53       |          |
| $t_i$    | 0.09     | 0.11     | 0.13     | 1.45     | 1.55     | 1.65     | 1.75     | 1.85     | 1.9      | 2.05     | 2.17     | 1.26     |          |
| V15      |          |          |          |          |          |          |          |          |          |          |          |          |          |
| $U_1$    | $U_2$    | $U_3$    | $U_4$    | $U_5$    | $U_6$    | $U_7$    | $U_8$    | $U_9$    | $U_{10}$ | $U_{11}$ | $U_{12}$ | $U_{13}$ | $U_{14}$ |
| 11       | 12.3     | 14       | 6.1      | 6.7      | 7.7      | 10.7     | 11.9     | 13.5     | 12.4     | 13.8     | 17.3     | 6.6      | 9        |
| $U_{15}$ | $U_{16}$ | $U_{17}$ | $U_{18}$ | $U_{19}$ | $U_{20}$ | $U_{21}$ | $U_{22}$ | $U_{23}$ | $U_{24}$ | $U_{25}$ | $U_{26}$ | $U_{27}$ |          |
| 11.3     | 11.5     | 14.7     | 15.3     | 14.9     | 20.3     | 22.3     | 10.6     | 10.4     | 13.1     | 14.2     | 17       | 18.3     |          |
| $t_1$    | $t_2$    | $t_3$    | $t_4$    | $t_5$    | $t_6$    | $t_7$    | $t_8$    | $t_9$    | $t_{10}$ | $t_{11}$ | $t_{12}$ | $t_{13}$ | $t_{14}$ |
| 13.4     | 13.6     | 13.8     | 14.1     | 14.3     | 14.5     | 14.7     | 14.9     | 15.1     | 15.5     | 15.7     | 15.8     | 16.2     | 16.4     |
| $t_{15}$ | $t_{16}$ | $t_{17}$ | $t_{18}$ | $t_{19}$ | $t_{20}$ | $t_{21}$ | $t_{22}$ | $t_{23}$ | $t_{24}$ | $t_{25}$ | $t_{26}$ | $t_{27}$ |          |
| 16.5     | 16.9     | 17.1     | 17.3     | 17.6     | 17.8     | 18       | 18.3     | 18.5     | 18.7     | 19       | 19.2     | 19.4     |          |

**Table S4.** Voltages ( $U_i$ , mV) and delays ( $t_i$ , ns) of pulses along the active conductor of CC 4.

| Node     |          | V5       |          |          | V10      |          |          |          |          |          |          |          |          |
|----------|----------|----------|----------|----------|----------|----------|----------|----------|----------|----------|----------|----------|----------|
| $i$      | 1        | 2        | 3        | 1        | 2        | 3        | 4        | 5        | 6        | 7        | 8        | 9        |          |
| $U_i$    | 132      | 151      | 175      | 34       | 39       | 44       | 39       | 44       | 51       | 45       | 51       | 58       |          |
| $t_i$    | 0.09     | 0.11     | 0.13     | 1.03     | 1.08     | 1.13     | 1.19     | 1.24     | 1.29     | 1.34     | 1.4      | 1.45     |          |
| V15      |          |          |          |          |          |          |          |          |          |          |          |          |          |
| $U_1$    | $U_2$    | $U_3$    | $U_4$    | $U_5$    | $U_6$    | $U_7$    | $U_8$    | $U_9$    | $U_{10}$ | $U_{11}$ | $U_{12}$ | $U_{13}$ | $U_{14}$ |
| 8.5      | 9.6      | 11.1     | 9.7      | 11       | 12.6     | 11       | 12.7     | 14.6     | 9.7      | 11       | 12.6     | 12.7     | 12.6     |
| $U_{15}$ | $U_{16}$ | $U_{17}$ | $U_{18}$ | $U_{19}$ | $U_{20}$ | $U_{21}$ | $U_{22}$ | $U_{23}$ | $U_{24}$ | $U_{25}$ | $U_{26}$ | $U_{27}$ |          |
| 14.6     | 12.7     | 14.8     | 16.6     | 11       | 14.8     | 14.9     | 12.5     | 18.1     | 18.9     | 16.4     | 20.2     | 19.6     |          |
| $t_1$    | $t_2$    | $t_3$    | $t_4$    | $t_5$    | $t_6$    | $t_7$    | $t_8$    | $t_9$    | $t_{10}$ | $t_{11}$ | $t_{12}$ | $t_{13}$ | $t_{14}$ |
| 16.2     | 16.4     | 16.6     | 16.8     | 17       | 17.3     | 17.5     | 17.6     | 17.9     | 18.7     | 19       | 19.2     | 19.4     | 19.6     |
| $t_{15}$ | $t_{16}$ | $t_{17}$ | $t_{18}$ | $t_{19}$ | $t_{20}$ | $t_{21}$ | $t_{22}$ | $t_{23}$ | $t_{24}$ | $t_{25}$ | $t_{26}$ | $t_{27}$ |          |
| 19.8     | 19.9     | 20.2     | 20.4     | 21.1     | 21.4     | 21.6     | 22       | 22.1     | 22.2     | 22.4     | 22.7     | 22.9     |          |

**Table S5.** Optimization results for a 3-conductor MF with a circular CS (where SC is stopping criteria).

| $N$           | $\varphi_1$ | $\varphi_2$ | $U_{\max}$ | time  | SC | $\varphi_1$   | $\varphi_2$ | $U_{\max}$ | time | SC |
|---------------|-------------|-------------|------------|-------|----|---------------|-------------|------------|------|----|
| $N_{it}=500$  |             |             |            |       |    | $N_{it}=1000$ |             |            |      |    |
| 1             | 50.6        | 348.8       | 0.714      | 651   | I  | 51.1          | 157.4       | 0.7        | 1299 | I  |
| 2             | 51          | 145.9       | 0.677      | 664   | I  | 50.8          | 154         | 0.697      | 1303 | I  |
| 3             | 50.5        | 349.8       | 0.714      | 650   | I  | 50.4          | 149.9       | 0.701      | 1308 | I  |
| 4             | 50.8        | 269.4       | 0.807      | 859   | I  | 48.2          | 343.4       | 0.729      | 1312 | I  |
| 5             | 50.7        | 344         | 0.722      | 674   | I  | 48            | 304.3       | 0.772      | 1309 | I  |
| 6             | 50.6        | 149.8       | 0.687      | 648.6 | I  | 50.9          | 349.8       | 0.716      | 1298 | I  |
| 7             | 26.4        | 139.7       | 0.713      | 651.5 | I  | 51            | 349.4       | 0.715      | 1301 | I  |
| 8             | 50.8        | 150.9       | 0.69       | 652   | I  | 50.7          | 150.2       | 0.686      | 1301 | I  |
| 9             | 51.2        | 258.1       | 0.811      | 649   | I  | 49.9          | 346         | 0.722      | 1306 | I  |
| 10            | 50.4        | 162.4       | 0.711      | 650   | I  | 50.8          | 153.4       | 0.694      | 1313 | I  |
| $N_{it}=2500$ |             |             |            |       |    | $N_{it}=5000$ |             |            |      |    |
| 1             | 50.4        | 149.5       | 0.706      | 2195  | Q  | 50.9          | 152.8       | 0.689      | 1685 | Q  |
| 2             | 50.7        | 139.8       | 0.704      | 2095  | Q  | 46.9          | 138.6       | 0.665      | 4060 | Q  |
| 3             | 49.8        | 346.2       | 0.727      | 2461  | Q  | 35.9          | 139.4       | 0.694      | 4614 | P  |
| 4             | 50.8        | 140.1       | 0.703      | 2705  | Q  | 51.1          | 143         | 0.668      | 3494 | Q  |
| 5             | 49.9        | 345.2       | 0.72       | 2048  | Q  | 50.9          | 146.9       | 0.676      | 6790 | I  |
| 6             | 51.1        | 162.6       | 0.713      | 3343  | I  | 51            | 138.8       | 0.652      | 2134 | Q  |
| 7             | 51          | 149.3       | 0.685      | 3330  | I  | 50.8          | 138.7       | 0.655      | 4330 | P  |
| 8             | 51          | 140.5       | 0.705      | 2807  | Q  | 50.8          | 349.2       | 0.714      | 4832 | Q  |
| 9             | 48.9        | 341.7       | 0.729      | 3315  | I  | 50.9          | 138.7       | 0.654      | 6906 | I  |
| 10            | 50.5        | 344.5       | 0.722      | 3401  | I  | 50.4          | 344.8       | 0.723      | 6739 | I  |

**Table S6.** Optimization results for a 4-conductor MF with a circular CS (where SC is stopping criteria).

| $N$           | $r_{P1}$ | $r_{P2}$ | $r_{P3}$ | $r_{td}$ | $R_{P1}$ | $R_{P2}$ | $R_{P3}$ | $\varphi_1$ | $\varphi_2$ | $\varphi_3$ | $U_{\max}$ | time | SC |
|---------------|----------|----------|----------|----------|----------|----------|----------|-------------|-------------|-------------|------------|------|----|
| $N_{it}=500$  |          |          |          |          |          |          |          |             |             |             |            |      |    |
| 1             | 0.876    | 0.529    | 0.853    | 0.59     | 2.436    | 2.764    | 2.395    | 37.8        | 128.4       | 330.2       | 0.53       | 1483 | I  |
| 2             | 0.576    | 0.678    | 0.884    | 0.418    | 2.445    | 2.3      | 2.241    | 44.1        | 137.4       | 189.3       | 0.65       | 1491 | I  |
| 3             | 0.506    | 0.867    | 0.873    | 0.583    | 2.697    | 2.437    | 2.419    | 47.3        | 140.6       | 190.2       | 0.63       | 1505 | I  |
| 4             | 0.6      | 0.618    | 0.539    | 0.599    | 2.639    | 2.521    | 2.099    | 50          | 135.5       | 181.4       | 0.7        | 1532 | I  |
| 5             | 0.841    | 0.594    | 0.567    | 0.338    | 2.109    | 2.087    | 1.874    | 31.7        | 146.1       | 345.2       | 0.7        | 1530 | I  |
| $N_{it}=1000$ |          |          |          |          |          |          |          |             |             |             |            |      |    |
| 1             | 0.812    | 0.622    | 0.889    | 0.316    | 2.097    | 2.365    | 2.134    | 33.9        | 136.3       | 314.9       | 0.6        | 2534 | I  |
| 2             | 0.863    | 0.614    | 0.863    | 0.335    | 2.181    | 2.3      | 2.126    | 40.6        | 138.8       | 339.4       | 0.61       | 2574 | I  |
| 3             | 0.847    | 0.708    | 0.787    | 0.261    | 2.062    | 2.268    | 1.992    | 43.4        | 143.5       | 352.6       | 0.68       | 2694 | I  |
| 4             | 0.852    | 0.725    | 0.831    | 0.206    | 1.992    | 1.995    | 1.992    | 25.8        | 160.8       | 331.7       | 0.74       | 2729 | I  |
| 5             | 0.618    | 0.794    | 0.703    | 0.654    | 2.656    | 2.555    | 2.293    | 58.2        | 158         | 225.4       | 0.6        | 2824 | I  |
| $N_{it}=2500$ |          |          |          |          |          |          |          |             |             |             |            |      |    |
| 1             | 0.866    | 0.714    | 0.864    | 0.635    | 2.482    | 2.465    | 2.429    | 36.9        | 150.2       | 342.8       | 0.58       | 6479 | I  |
| 2             | 0.673    | 0.652    | 0.897    | 0.677    | 2.342    | 2.293    | 2.5      | 40.4        | 151.4       | 343         | 0.64       | 6981 | I  |
| 3             | 0.694    | 0.872    | 0.808    | 0.584    | 2.386    | 2.397    | 2.412    | 53.3        | 141.9       | 356.3       | 0.62       | 7670 | I  |
| 4             | 0.59     | 0.547    | 0.824    | 0.534    | 2.393    | 2.531    | 2.295    | 33          | 130.9       | 343.5       | 0.62       | 9015 | I  |
| 5             | 0.821    | 0.523    | 0.833    | 0.607    | 2.415    | 2.795    | 2.423    | 25.2        | 128.1       | 181.2       | 0.67       | 6599 | I  |

| $N_{it}=5000$ |       |       |       |       |       |       |       |      |       |       |      |       |   |
|---------------|-------|-------|-------|-------|-------|-------|-------|------|-------|-------|------|-------|---|
| 1             | 0.63  | 0.639 | 0.9   | 0.692 | 2.416 | 2.719 | 2.517 | 40.3 | 161.4 | 334.2 | 0.67 | 14592 | I |
| 2             | 0.873 | 0.718 | 0.9   | 0.558 | 2.361 | 2.482 | 2.383 | 40.6 | 145.6 | 348.1 | 0.55 | 17919 | I |
| 3             | 0.51  | 0.678 | 0.876 | 0.539 | 2.651 | 2.337 | 2.354 | 60.3 | 141.7 | 289.4 | 0.58 | 22559 | I |
| 4             | 0.713 | 0.542 | 0.89  | 0.463 | 2.389 | 2.639 | 2.291 | 38.5 | 131.2 | 341.6 | 0.59 | 14376 | I |
| 5             | 0.718 | 0.808 | 0.899 | 0.682 | 2.341 | 2.582 | 2.506 | 27.1 | 167   | 320.8 | 0.59 | 18403 | I |

**Table S7.** Optimization results for a 3-conductor MF with a circular CS with insulation around the conductors (where SC is stopping criteria)

| $N$           | $r_{P1}$ | $r_{P2}$ | $r_{tA}$ | $r_{tP1}$ | $r_{tP2}$ | $r_{tR}$ | $R_{P1}$ | $R_{P2}$ | $\varphi_1$ | $\varphi_2$ | $U_{max}$ | time  | SC |
|---------------|----------|----------|----------|-----------|-----------|----------|----------|----------|-------------|-------------|-----------|-------|----|
| $N_{it}=500$  |          |          |          |           |           |          |          |          |             |             |           |       |    |
| 1             | 0.518    | 0.549    | 0.284    | 0.465     | 0.288     | 0.648    | 2.61     | 2.463    | 38          | 260         | 0.83      | 4568  | I  |
| 2             | 0.879    | 0.852    | 0.79     | 0.978     | 0.589     | 0.582    | 3.393    | 3.617    | 25.7        | 280.8       | 0.91      | 4455  | I  |
| 3             | 0.531    | 0.651    | 0.415    | 0.592     | 0.388     | 0.516    | 2.811    | 2.965    | 40.4        | 338.8       | 0.84      | 4560  | I  |
| 4             | 0.553    | 0.642    | 0.363    | 0.371     | 0.553     | 0.637    | 2.556    | 2.926    | 21.6        | 260         | 0.87      | 4530  | I  |
| 5             | 0.882    | 0.717    | 0.472    | 0.597     | 0.575     | 0.499    | 2.927    | 2.93     | 30          | 260         | 0.83      | 4512  | I  |
| $N_{it}=1000$ |          |          |          |           |           |          |          |          |             |             |           |       |    |
| 1             | 0.744    | 0.679    | 0.175    | 0.23      | 0.231     | 0.649    | 2.817    | 2.756    | 46          | 281.9       | 0.81      | 9200  | I  |
| 2             | 0.574    | 0.539    | 0.484    | 0.398     | 0.742     | 0.599    | 2.539    | 3.257    | 22.8        | 283.3       | 0.84      | 9210  | I  |
| 3             | 0.666    | 0.678    | 0.349    | 0.551     | 0.495     | 0.594    | 2.881    | 2.801    | 39.1        | 260         | 0.84      | 9140  | I  |
| 4             | 0.84     | 0.657    | 0.42     | 0.54      | 0.56      | 0.574    | 2.985    | 2.848    | 31.2        | 280.6       | 0.84      | 9110  | I  |
| 5             | 0.703    | 0.841    | 0.772    | 0.963     | 0.675     | 0.443    | 3.119    | 2.912    | 13.7        | 260         | 0.87      | 9133  | I  |
| $N_{it}=2500$ |          |          |          |           |           |          |          |          |             |             |           |       |    |
| 1             | 0.582    | 0.757    | 0.576    | 0.544     | 0.898     | 0.458    | 2.579    | 3.158    | 23.8        | 246.5       | 0.8       | 14075 | I  |
| 2             | 0.776    | 0.655    | 0.593    | 0.817     | 0.713     | 0.59     | 3.138    | 3.127    | 30          | 288.2       | 0.79      | 15242 | I  |
| 3             | 0.69     | 0.582    | 0.592    | 0.797     | 0.734     | 0.528    | 3.002    | 2.772    | 27.4        | 213         | 0.83      | 16992 | I  |
| 4             | 0.797    | 0.518    | 0.755    | 0.955     | 0.896     | 0.68     | 3.453    | 3.028    | 21.4        | 227         | 0.81      | 18699 | I  |
| 5             | 0.602    | 0.513    | 0.716    | 0.942     | 0.752     | 0.691    | 3.272    | 3.15     | 17.2        | 271.1       | 0.8       | 20222 | I  |
| $N_{it}=5000$ |          |          |          |           |           |          |          |          |             |             |           |       |    |
| 1             | 0.706    | 0.62     | 0.648    | 0.852     | 0.708     | 0.694    | 3.396    | 3.076    | 28.9        | 300         | 0.79      | 32947 | I  |
| 2             | 0.656    | 0.701    | 0.389    | 0.534     | 0.633     | 0.5      | 2.711    | 2.798    | 39.4        | 193.6       | 0.79      | 29278 | I  |
| 3             | 0.841    | 0.53     | 0.67     | 0.895     | 0.979     | 0.675    | 3.397    | 3.134    | 32.2        | 235.6       | 0.78      | 42332 | I  |
| 4             | 0.845    | 0.526    | 0.761    | 0.962     | 0.919     | 0.678    | 3.474    | 3.254    | 24.2        | 280.3       | 0.78      | 33748 | I  |
| 5             | 0.751    | 0.556    | 0.658    | 0.874     | 0.71      | 0.641    | 3.353    | 2.992    | 27.4        | 299.1       | 0.79      | 51281 | I  |
